# Supplementary material for: Development of Jelly Loaded with Nanogel Containing Natural L-Dopa from Mucuna pruriens Seed Extract for Neuroprotection in Parkinson’s Disease
Source: MDPI journal article supplement (doi:10.3390/pharmaceutics14051079), 2022-05-17
Supplement: s1 [file s1]

## Supplementary data

**Table S1** LOD and LOQ of L-dopa detected by UV-Visible spectrophotometry in different media

|                          | SGF    | SIF    | PBS    | HPLC |
|--------------------------|--------|--------|--------|------|
| LOD ( $\mu\text{g/mL}$ ) | 37.75  | 67.32  | 37.99  | 0.43 |
| LOQ ( $\mu\text{g/mL}$ ) | 114.39 | 204.02 | 115.13 | 1.42 |

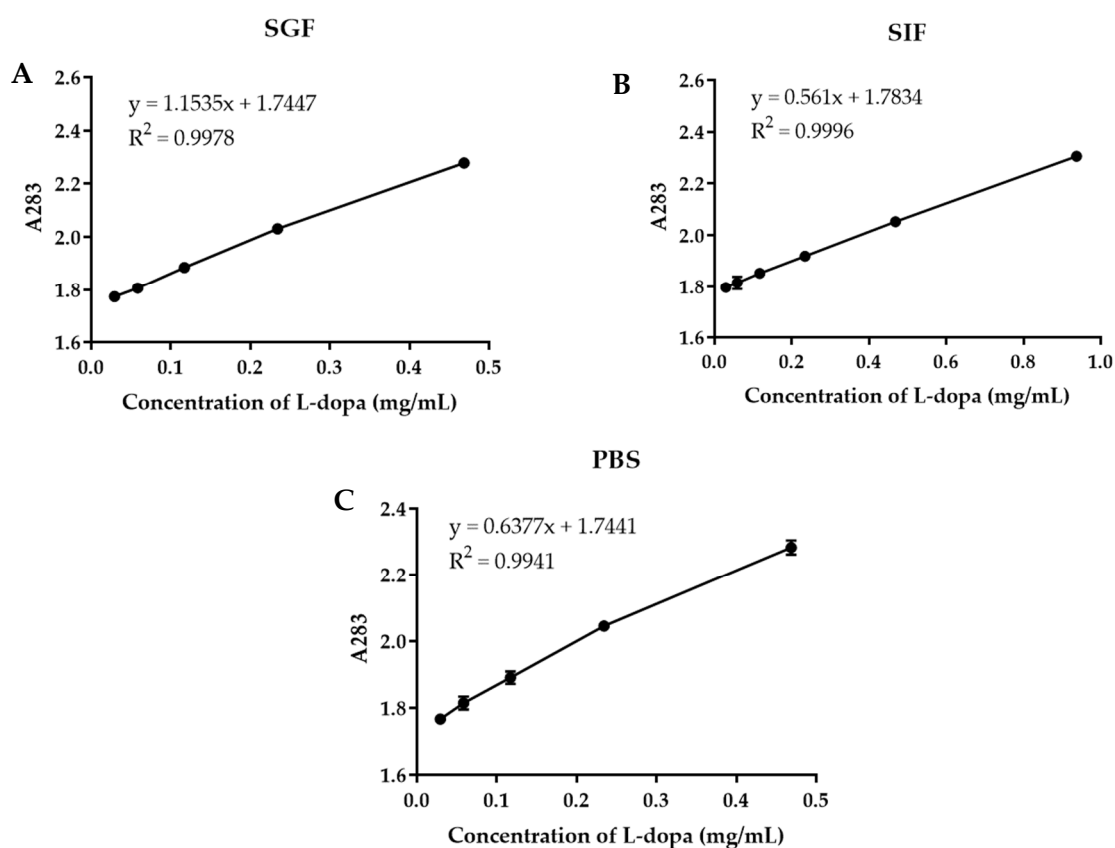

**Supplementary Figure S1** Standard curve of L-dopa in (A) SGF, (B) SIF, and (C) PBS

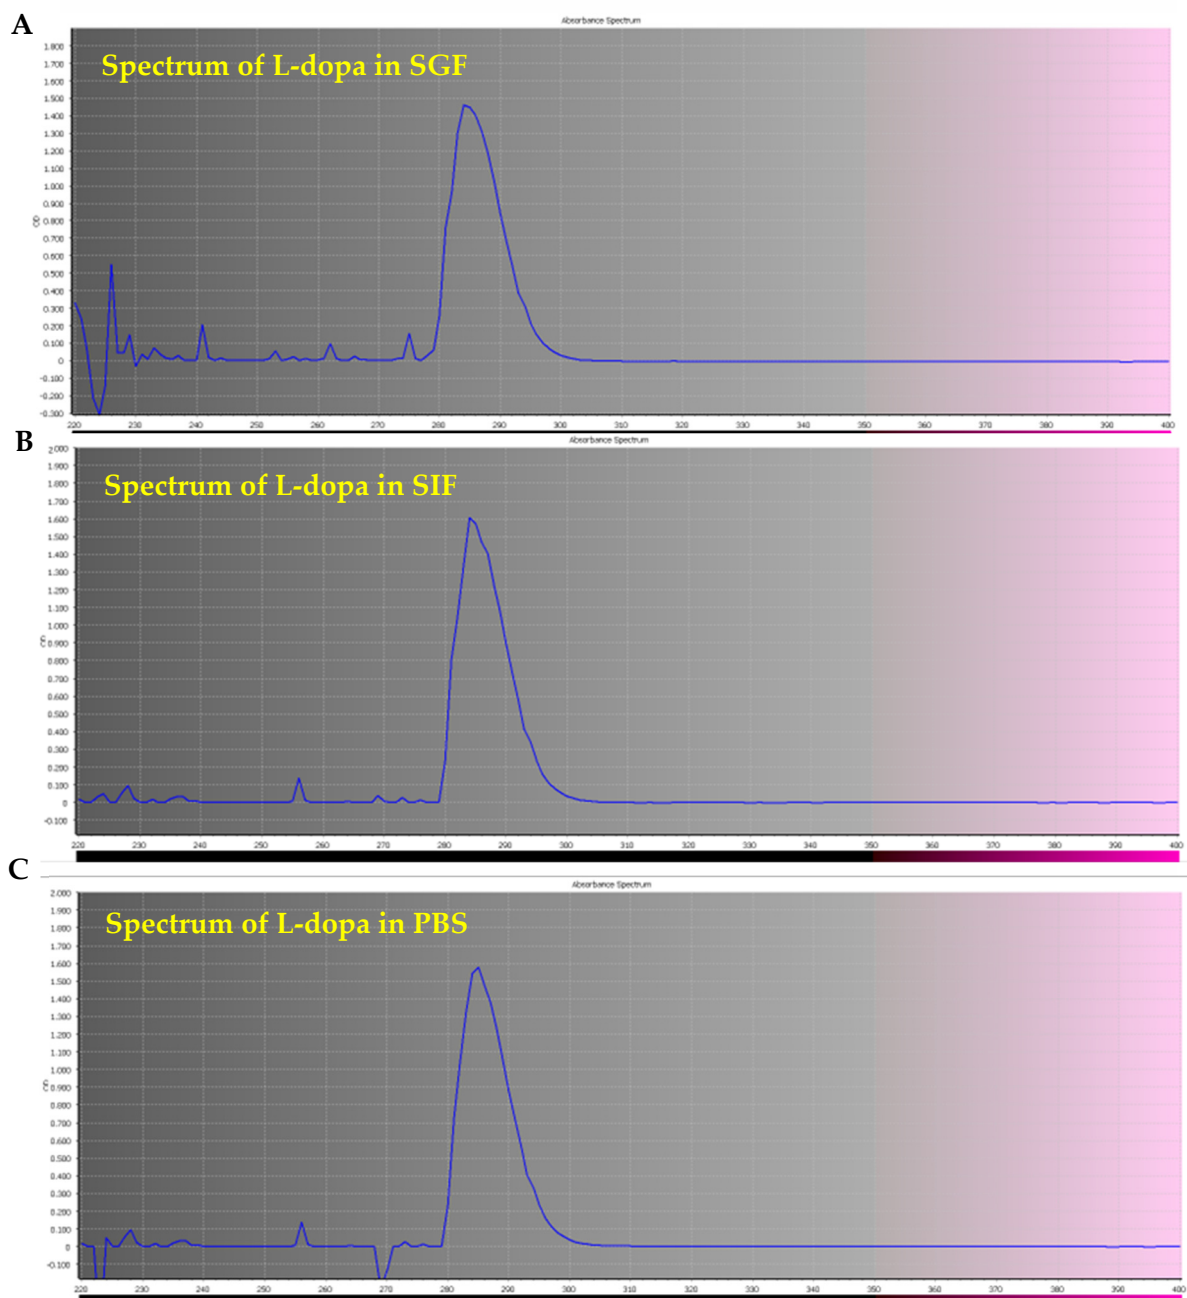

**Supplementary Figure S2** UV-Visible spectra of L-dopa in (A) SGF, (B) SIF, and (C) PBS.

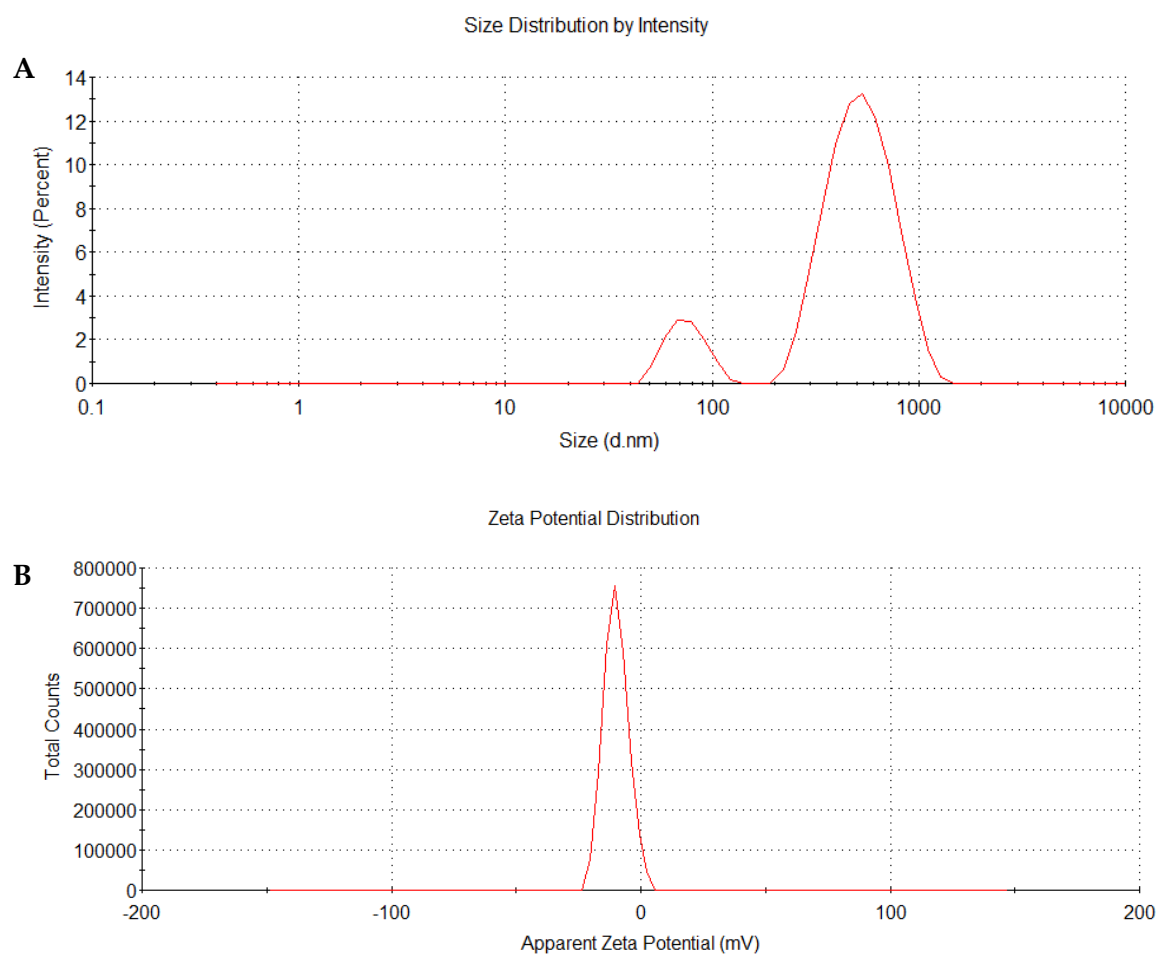

**Supplementary Figure S3** Dynamic light scattering spectra of *M. pruriens* seed extract nanogel presenting (A) size distribution and (B) zeta potential value
